# Supplementary material for: Bacterial endosymbionts influence host sexuality and reveal reproductive genes of early divergent fungi
Source: PubMed Central journal article supplement (PMC5705715; doi:10.1038/s41467-017-02052-8), 2017-11-29
Supplement: 41467_2017_2052_MOESM2_ESM.pdf [file 41467_2017_2052_MOESM2_ESM.pdf]

**Supplementary Table 1.** Spontaneous loss of endobacteria and asexual sporulation during serial propagation of *Rm* ATCC 52813 lines 1-1, 1-2, 2-1, 2-2, 3-1, 3-2 via single spores and mycelial fragments. P, present; A, absent.

| Generation | Sporulation in single spore lines |     |     |     |     |     | Sporulation in mycelial fragment lines |     |     |     |     |     |
|------------|-----------------------------------|-----|-----|-----|-----|-----|----------------------------------------|-----|-----|-----|-----|-----|
|            | 1-1                               | 1-2 | 2-1 | 2-2 | 3-1 | 3-2 | 1-1                                    | 1-2 | 2-1 | 2-2 | 3-1 | 3-2 |
| 1          | P                                 | P   | P   | P   | P   | P   | P                                      | P   | P   | P   | P   | P   |
| 2          | P                                 | P   | P   | P   | P   | P   | P                                      | P   | P   | P   | P   | P   |
| 3          | P                                 | P   | P   | P   | P   | P   | P                                      | P   | P   | P   | P   | P   |
| 4          | P                                 | P   | P   | P   | P   | P   | P                                      | P   | P   | P   | P   | P   |
| 5          | A                                 | A   | P   | P   | P   | P   | P                                      | P   | P   | P   | P   | P   |
| 6          | A                                 | A   | P   | P   | P   | P   | P                                      | P   | P   | P   | P   | P   |
| 7          | A                                 | A   | P   | P   | P   | P   | P                                      | P   | P   | P   | P   | P   |
| 8          | A                                 | A   | P   | P   | P   | P   | P                                      | P   | P   | P   | P   | P   |
| 9          | A                                 | A   | P   | P   | P   | P   | P                                      | P   | P   | P   | P   | P   |
| 10         | A                                 | A   | P   | P   | P   | P   | P                                      | P   | P   | P   | P   | P   |
| 11         | A                                 | A   | P   | P   | P   | P   | P                                      | P   | P   | P   | P   | P   |
| 12         | A                                 | A   | P   | P   | P   | P   | P                                      | P   | P   | P   | P   | P   |
| 13         | A                                 | A   | P   | P   | P   | P   | P                                      | P   | A   | P   | P   | P   |
| 14         | A                                 | A   | P   | P   | P   | P   | P                                      | P   | A   | P   | P   | P   |
| 15         | A                                 | A   | P   | P   | P   | P   | P                                      | P   | A   | P   | P   | P   |

**Supplementary Table 2.** Effects of various environmental factors on asexual and sexual reproduction in B(+) and B(-) isolates of *Rm* ATCC 52813 and ATCC 52814. +, normal reproduction; ++, exceptionally robust reproduction; ±, reduced reproduction; A, reproduction absent; X, failure to grow vegetatively; (Y), accumulation of β-carotene; (YY), rapid accumulation of β-carotene; NA, data not available. Each observation summarizes three replicate cultures.

| Environmental factor                   | Wild type fungi harboring endobacteria |        |                     |        | Fungi cured of endobacteria |        |                     |        |
|----------------------------------------|----------------------------------------|--------|---------------------|--------|-----------------------------|--------|---------------------|--------|
|                                        | ATCC 52813                             |        | ATCC 52814          |        | ATCC 52813                  |        | ATCC 52814          |        |
| level                                  | asexual sporulation                    | mating | asexual sporulation | mating | asexual sporulation         | mating | asexual sporulation | mating |
| <b>Thiamine</b>                        | +                                      | +      | +                   | +      | A                           | A      | A                   | A      |
| <b>β-carotene</b>                      | +                                      | +      | +                   | +      | A                           | A      | A                   | A      |
| <b>NaNO<sub>3</sub></b>                | +                                      | +      | +                   | +      | A                           | A      | A                   | A      |
| <b>NaNO<sub>2</sub></b>                | ±                                      | +      | ±                   | +      | A                           | A      | A                   | A      |
| <b>Mated culture extract</b>           | +                                      | +      | +                   | +      | A                           | A      | A                   | A      |
| <b>Humidity</b>                        |                                        |        |                     |        |                             |        |                     |        |
| high                                   | +                                      | +      | +                   | +      | A                           | A      | A                   | A      |
| low                                    | ++                                     | +      | ++                  | +      | A(Y)                        | A      | A(Y)                | A      |
| <b>Light</b>                           |                                        |        |                     |        |                             |        |                     |        |
| ambient                                | +                                      | +      | +                   | +      | A                           | A      | A                   | A      |
| darkness                               | +                                      | +      | +                   | +      | A                           | A      | A                   | A      |
| <b>Cold treatment</b>                  |                                        |        |                     |        |                             |        |                     |        |
| 0 weeks                                | +                                      | +      | +                   | +      | A                           | A      | A                   | A      |
| 1 week                                 | +                                      | +      | +                   | +      | A                           | A      | A                   | A      |
| 2 weeks                                | +                                      | +      | +                   | +      | A                           | A      | A                   | A      |
| 4 weeks                                | +                                      | +      | +                   | +      | A                           | A      | A                   | A      |
| <b>H<sub>2</sub>O<sub>2</sub> [mM]</b> |                                        |        |                     |        |                             |        |                     |        |
| 0.0                                    | +                                      | NA     | +                   | NA     | A                           | NA     | A                   | NA     |
| 0.3                                    | ±                                      | NA     | ±                   | NA     | A                           | NA     | A                   | NA     |
| 0.6                                    | ±                                      | NA     | ±                   | NA     | A                           | NA     | A                   | NA     |
| 1.2                                    | ±                                      | NA     | ±                   | NA     | A                           | NA     | A                   | NA     |
| 2.4                                    | ±                                      | NA     | ±                   | NA     | A                           | NA     | A                   | NA     |
| 10.0                                   | X                                      | NA     | X                   | NA     | X                           | NA     | X                   | NA     |
| <b>NaCl [M]</b>                        |                                        |        |                     |        |                             |        |                     |        |
| 0.0                                    | +                                      | NA     | +                   | NA     | A                           | NA     | A                   | NA     |
| 0.4                                    | +                                      | NA     | ++                  | NA     | A(YY)                       | NA     | A(YY)               | NA     |
| 0.8                                    | +                                      | NA     | ++                  | NA     | A(YY)                       | NA     | A(YY)               | NA     |
| 1.6                                    | +                                      | NA     | ++                  | NA     | A(YY)                       | NA     | A(YY)               | NA     |

**Supplementary Table 3.** Genome assembly statistics for *Rm* ATCC 52813 and comparative organisms from the Mucoromycotina subphylum.

|                     | <i>Rhizopus<br/>microsporus<br/>ATCC 52813</i> | <i>Rhizopus<br/>microsporus<br/>ATCC 52814</i> | <i>Rhizopus<br/>microsporus<br/>ATCC 11559</i> | <i>Rhizopus<br/>chinensis<br/>CCTCCM201021</i> | <i>Rhizopus<br/>deleamar<br/>99-880</i> |
|---------------------|------------------------------------------------|------------------------------------------------|------------------------------------------------|------------------------------------------------|-----------------------------------------|
| Assembly length, bp | 25,972,395                                     | 24,950,816                                     | 24,077,254                                     | 45,739,792                                     | 46,087,117                              |
| Number of scaffolds | 131                                            | 560                                            | 595                                            | 3,281                                          | 81                                      |
| Scaffold N50        | 8                                              | 8                                              | 87                                             | 463                                            | 6                                       |
| Scaffold L50, bp    | 1,118,338                                      | 105,542                                        | 84,607                                         | 30,430                                         | 3,104,119                               |
| Number of contigs   | 823                                            | 649                                            | 653                                            | 3,374                                          | 389                                     |
| Contig N50          | 111                                            | 84                                             | 96                                             | 469                                            | 46                                      |
| Contig L50, bp      | 69,382                                         | 92,626                                         | 73,149                                         | 30,211                                         | 303,660                                 |
| % GC                | 37.48                                          | 37.42                                          | 37.25                                          | 36.92                                          | 35.6                                    |

**Supplementary Table 4.** Homology support and functional assignment statistics for *Rm* ATCC 52813 gene models.

|                                     | <i>Rhizopus microsporus</i><br>ATCC 52813 |      | <i>Rhizopus chinensis</i><br>CCTCCM201021 |      | <i>Rhizopus delemar</i><br>99-880 |      |
|-------------------------------------|-------------------------------------------|------|-------------------------------------------|------|-----------------------------------|------|
| Number of genes                     | 10,905                                    | 100% | 17,676                                    | 100% | 17,467                            | 100% |
| Hits to databases:                  |                                           |      |                                           |      |                                   |      |
| KEGG                                | 8,119                                     | 74%  | 13,686                                    | 77%  | 11,456                            | 66%  |
| KOG                                 | 7,601                                     | 70%  | 12,878                                    | 73%  | 9,028                             | 52%  |
| Swissprot                           | 7,688                                     | 71%  | 12,964                                    | 73%  | 10,609                            | 61%  |
| nr_b_b                              | 7,835                                     | 72%  | 15,983                                    | 90%  | 10,565                            | 60%  |
| HMMPfam                             | 6,587                                     | 60%  | 11,056                                    | 63%  | 9,030                             | 52%  |
| Number of genes with complete CDS   | 10,229                                    | 94%  | 16,036                                    | 91%  | 17,412                            | 100% |
| Proteins with transmembrane helices | 1,863                                     | 17%  | 2,934                                     | 17%  | 2,133                             | 12%  |
| Proteins with signal peptide        | 1,294                                     | 12%  | 1,960                                     | 11%  | 1,546                             | 9%   |

**Supplementary Table 5.** Reproductive proteins across fungi. Unless otherwise noted, *A. nidulans* nomenclature is used following Dyer and O'Gorman<sup>1</sup>; <sup>a</sup>*S. cerevisiae* nomenclature; <sup>b</sup>*P. blakesleeanus* nomenclature; <sup>c</sup>*U. maydis* nomenclature.

| Protein                   | LocusID           | NCBI accession                  | Role in reproduction                                                   | Reference  |
|---------------------------|-------------------|---------------------------------|------------------------------------------------------------------------|------------|
| <b>CpcA</b>               | AN3675            | CBF75634                        | Amino acid sensing                                                     | 2          |
| <b>CpcB</b>               | AN4163            | CBF74576                        | Amino acid sensing                                                     | 2          |
| <b>ImeB</b>               | AN6243            | CBF69873                        | Light response, sexual development, secondary metabolism               | 3          |
| <b>LsdA</b>               | AN2330            | CBF86620                        | Osmotic stress sensing                                                 | 4          |
| <b>LreA</b>               | AN3435            | CBF82714                        | Blue light sensing                                                     | 5          |
| <b>LreB</b>               | AN3607            | CBF75789                        | Blue light sensing                                                     | 5          |
| <b>CryA</b>               | AN0387            | CBF89585                        | Blue light and UV sensing                                              | 6          |
| <b>FphA</b>               | AN9008            | CBF84471                        | Red light sensing                                                      | 7          |
| <b>VeA/VosA</b>           | AN1052/<br>AN1959 | CBF88249/<br>CBF85898           | Light/dark response regulator, secondary metabolite production         | 8,9        |
| <b>VelB</b>               | AN0363            | CBF89638                        | Light/dark response regulator, secondary metabolite production         | 8          |
| <b>LaeA</b>               | AN0807            | CBF88745                        | Light/dark response regulator, secondary metabolite production         | 8          |
| <b>VelC</b>               | AN2059            | CBF86097                        | Light/dark response regulator, secondary metabolite production         | 10         |
| <b>Pho80</b>              | AN5156            | CBF80977                        | Phosphorous sensing cyclin                                             | 11         |
| <b>PhoA</b>               | AN8261            | CBF74234                        | Phosphorous sensing, interacts with Pho80                              | 12         |
| <b>FhbA</b>               | AN7169            | CBF78937                        | Nitrogen metabolism                                                    | 13         |
| <b>MAT1</b>               | AN2755            | CBF84081                        | Transcription factor: regulator of sexual reproduction                 | 14         |
| <b>MAT2</b>               | AN4734            | CBF76901                        | HMG box transcription factor: regulator of sexual reproduction         | 14         |
| <b>SexP<sup>b</sup></b>   | NA                | ABX27912                        | HMG box transcription factor: regulator of sexual reproduction         | 15         |
| <b>bE1<sup>c</sup></b>    | UM00577           | XP_011386823                    | Homeobox domain transcription factor: regulator of sexual reproduction | 16         |
| <b>bW1<sup>c</sup></b>    | UM00578           | XP_011386405                    | Homeobox domain transcription factor: regulator of sexual reproduction | 16         |
| <b>Ram1p<sup>a</sup></b>  | YDL090C           | NP_010193                       | Pheromone biogenesis: a-factor prenylation                             | 17         |
| <b>Ste24p<sup>a</sup></b> | YJR117W           | NP_012651                       | Pheromone biogenesis: a-factor proteolysis                             | 18         |
| <b>Ste14p<sup>a</sup></b> | YDR410C           | NP_010698                       | Pheromone biogenesis: a-factor carboxyl methylation                    | 19         |
| <b>Ste23p<sup>a</sup></b> | YLR389C           | NP_013493                       | Pheromone biogenesis: a-factor proteolysis                             | 20         |
| <b>Axl1p<sup>a</sup></b>  | YPR122W           | NP_015447                       | Pheromone biogenesis: a-factor proteolysis                             | 20         |
| <b>Ste6p<sup>a</sup></b>  | YKL209C           | NP_012713                       | Pheromone biogenesis: a-factor transporter                             | 21         |
| <b>Ste13p<sup>a</sup></b> | YOR219C           | NP_014862                       | Pheromone biogenesis: a-factor processing                              | 22         |
| <b>PpgA</b>               | AN5791            | CBF81183                        | Pheromone precursor ( $\alpha$ type)                                   | 14         |
| <b>PreA/GprB</b>          | AN7743            | CBF80019                        | GPCR: a type pheromone receptor                                        | 23,24      |
| <b>PreB/GprA</b>          | AN2520            | CBF87016                        | GPCR: $\alpha$ type pheromone receptor                                 | 23,24      |
| <b>GprD</b>               | AN3387            | CBF82810                        | GPCR                                                                   | 25         |
| <b>GprK</b>               | AN7795            | CBF80123                        | GPCR                                                                   | 26         |
| <b>TAR1</b>               | NA                | To be provided upon publication | GPCR: candidate risporic acid receptor                                 | This study |

|                               |         |                                 |                                                                                                     |            |
|-------------------------------|---------|---------------------------------|-----------------------------------------------------------------------------------------------------|------------|
| <b>TAR2</b>                   | NA      | To be provided upon publication | GPCR: candidate trisporic acid receptor                                                             | This study |
| <b>TAR3</b>                   | NA      | To be provided upon publication | GPCR: candidate trisporic acid receptor                                                             | This study |
| <b>Gpa3<sup>c</sup></b>       | UM04474 | P87034                          | <i>U. maydis</i> G protein $\alpha$ subunit: signaling to pheromone MAP kinase and cAMP cascades    | 27         |
| <b>FadA</b>                   | AN0651  | CBF89057                        | G protein $\alpha$ subunit: signaling to pheromone MAP kinase cascade                               | 28         |
| <b>SfaD</b>                   | AN0081  | CBF90238                        | G protein $\beta$ subunit: signaling to pheromone MAP kinase cascade                                | 28         |
| <b>GpgA</b>                   | AN2742  | CBF84107                        | G protein $\gamma$ subunit: signaling to pheromone MAP kinase cascade                               | 29         |
| <b>PhnA</b>                   | AN0082  | CBF90234                        | Regulator of GpgA, SfaD and FibA                                                                    | 30         |
| <b>FibA</b>                   | AN5893  | CBF70620                        | Regulator of G-protein signaling                                                                    | 31         |
| <b>Sql2<sup>c</sup></b>       | UM01516 | XP_011387982                    | Regulator of Ras2                                                                                   | 32         |
| <b>RasA</b>                   | AN0182  | CBF90024                        | Ras signaling protein involved in asexual development                                               | 2          |
| <b>Ras2<sup>c</sup></b>       | UM01643 | XP_011387629                    | Ras signaling protein involved in reproductive development, cAMP regulation, and filamentous growth | 33         |
| <b>Msn5p<sup>a</sup></b>      | YDR335W | NP_010622                       | Nuclear import and export of sex-related transcription factors                                      | 34         |
| <b>Uac1<sup>c</sup></b>       | UM05232 | XP_761379                       | Adenylate cyclase                                                                                   | 35         |
| <b>Uka1-1/1-2<sup>c</sup></b> | UM01124 | XP_757271                       | cAMP dependent protein kinase catalytic subunit                                                     | 36         |
| <b>Ubc1<sup>c</sup></b>       | UM06450 | XP_762597                       | cAMP dependent protein kinase regulatory subunit                                                    | 35         |
| <b>Far1p<sup>a</sup></b>      | YJL157C | NP_012378                       | Pheromone regulation                                                                                | 37         |
| <b>Cdc42p<sup>a</sup></b>     | YLR229C | NP_013330                       | Rho-GTPase, cell polarity                                                                           | 38         |
| <b>Cdc24p<sup>a</sup></b>     | YAL041W | NP_009359                       | Guanyl nucleotide exchange factor for Cdc42, cell polarity                                          | 39         |
| <b>Cdc28p<sup>a</sup></b>     | YBR160W | NP_009718                       | Cyclin-dependent kinase catalytic subunit                                                           | 40         |
| <b>Ste20p<sup>a</sup></b>     | YHL007C | NP_011856                       | Pheromone response                                                                                  | 41         |
| <b>SteD</b>                   | AN7252  | CBF78763                        | Pheromone MAP kinase cascade regulator                                                              | 14         |
| <b>Ste5p<sup>a</sup></b>      | YDR103W | NP_010388                       | Pheromone MAP kinase cascade scaffold                                                               | 42         |
| <b>Ste20</b>                  | AN5674  | CBF81427                        | MAP kinase, kinase, kinase, kinase (pheromone cascade)                                              | 1          |
| <b>SteC</b>                   | AN2269  | CBF86503                        | MAP kinase, kinase, kinase (pheromone cascade)                                                      | 43         |
| <b>Ste7</b>                   | AN3422  | CBF82742                        | MAP kinase, kinase (pheromone cascade)                                                              | 14         |
| <b>MpkB</b>                   | AN3719  | CBF75537                        | Map kinase (pheromone cascade)                                                                      | 14         |
| <b>CandA-C</b>                | AN2458  | CBF86897                        | Regulate reproductive mode in response to light                                                     | 44         |
| <b>CandA-N</b>                | AN10306 | CBF86906                        | Regulate reproductive mode in response to light                                                     | 44         |
| <b>Dig1p<sup>a</sup></b>      | YPL049C | NP_015276                       | Regulation of mating-specific genes                                                                 | 45         |
| <b>Dig2p<sup>a</sup></b>      | YDR480W | NP_010768                       | Regulation of mating-specific genes                                                                 | 45         |
| <b>Msg5p<sup>a</sup></b>      | YNL053W | NP_014345                       | Regulation of pheromone MAP kinase cascade                                                          | 46         |
| <b>CsnA</b>                   | AN1491  | CBF84973                        | Regulation of sexual development                                                                    | 47         |
| <b>CsnB</b>                   | AN4783  | CBF76790                        | Regulation of sexual development                                                                    | 47         |
| <b>CsnD</b>                   | AN1539  | CBF85069                        | Regulation of sexual development                                                                    | 47         |
| <b>CsnE</b>                   | AN2129  | CBF86237                        | Regulation of sexual development                                                                    | 47         |

|                          |                   |                       |                                                                       |    |
|--------------------------|-------------------|-----------------------|-----------------------------------------------------------------------|----|
| <b>CsnG/AcoB</b>         | AN3623            | CBF75752              | Regulation of sexual development                                      | 47 |
| <b>StrA</b>              | AN8071            | CBF73824              | Sexual and asexual development: striatin scaffolding and Ca signaling | 48 |
| <b>EsdC</b>              | AN9121            | CBF82506              | Sexual development                                                    | 49 |
| <b>RcoA</b>              | AN6505            | CBF70872              | Sexual vs asexual development, secondary metabolism                   | 50 |
| <b>PpoA/PpoC</b>         | AN1967/<br>AN5028 | CBF85912/<br>CBF76249 | Sexual vs asexual development, secondary metabolism (oxylipin)        | 51 |
| <b>PpoB</b>              | AN6320            | CBF69709              | Sexual vs asexual development, secondary metabolism (oxylipin)        | 51 |
| <b>Sir3p<sup>a</sup></b> | YLR442C           | NP_013547             | Silencing MAT loci                                                    | 52 |
| <b>Sir4p<sup>a</sup></b> | YDR227W           | NP_010513             | Silencing MAT loci                                                    | 53 |
| <b>HogA</b>              | AN1017            | CBF88327              | Stress response                                                       | 54 |
| <b>AtfA</b>              | AN2911            | CBF83765              | Stress response                                                       | 55 |
| <b>MsnA</b>              | AN1652            | CBF85299              | Transcription factor                                                  | 1  |
| <b>StuA</b>              | AN5836            | CBF70741              | Transcription factor                                                  | 56 |
| <b>DopA</b>              | AN2094            | CBF86166              | Transcription factor                                                  | 57 |
| <b>MedA</b>              | AN6230            | CBF69898              | Transcription factor                                                  | 58 |
| <b>FhpA</b>              | AN4521            | CBF77337              | Transcription factor                                                  | 59 |
| <b>DevR</b>              | AN7553            | CBF79619              | Transcription factor                                                  | 60 |
| <b>NosA</b>              | AN1848            | CBF85681              | Transcription factor                                                  | 61 |
| <b>FibE</b>              | AN0721            | CBF88918              | Transcription factor                                                  | 62 |
| <b>FibC</b>              | AN2421            | CBF86815              | Transcription factor                                                  | 63 |
| <b>NsdC</b>              | AN4263            | CBF74364              | Transcription factor                                                  | 64 |
| <b>NsdD</b>              | AN3152            | CBF83303              | Transcription factor                                                  | 31 |
| <b>RosA</b>              | AN5170            | CBF81007              | Transcription factor                                                  | 65 |
| <b>SteA</b>              | AN2290            | CBF86542              | Transcription factor activated by pheromone MAP kinase cascade        | 66 |
| <b>SiIG</b>              | AN0709            | CBF88942              | Transcription factor: light response                                  | 1  |
| <b>SiIA</b>              | AN1893            | CBF85772              | Transcription factor: light response                                  | 1  |
| <b>TrxA</b>              | AN0170            | CBF90049              | Redox regulation                                                      | 67 |
| <b>NoxA</b>              | AN5457            | CBF81876              | Redox regulation                                                      | 68 |
| <b>SidC</b>              | AN0607            | CBF89140              | Iron regulation (NRPS)                                                | 69 |
| <b>HxtA</b>              | AN6923            | CBF71745              | Hexose transport                                                      | 70 |
| <b>MutA</b>              | AN7349            | CBF78568              | Carbohydrate catabolism, mutanase activity                            | 71 |
| <b>SamB</b>              | AN0078            | CBF90245              | Cell polarity                                                         | 72 |
| <b>GrrA</b>              | AN10516           | CBF74496              | Meiotic structure development                                         | 73 |
| <b>TubB</b>              | AN0316            | CBF89739              | Microtubule assembly                                                  | 74 |

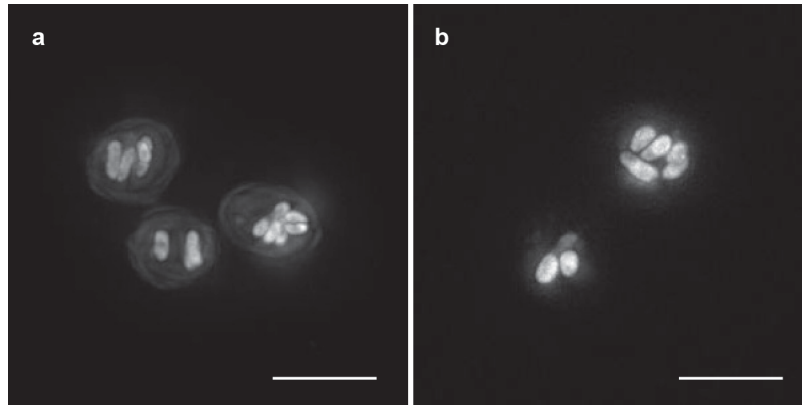

**Supplementary Figure 1. *Burkholderia* endobacteria in sporangiospores of *Rm*. (a) ATCC 52813. (b) ATCC 52814. For visualization, bacteria expressed mCherry fluorescent protein in ATCC 52813 and YFP in ATCC 52814. Scale bars, 5  $\mu$ m.**



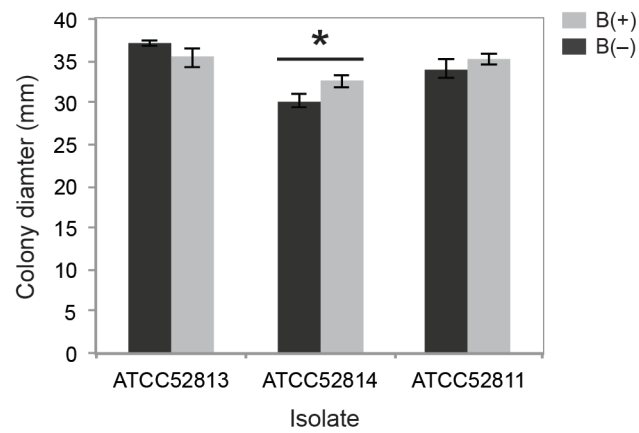

**Supplementary Figure 2. Impact of *Burkholderia* endobacteria on *Rm* colony expansion.** Colony diameter was measured after one day of growth. \*,  $t$  test  $0.05 \geq P > 0.01$ . Error bars represent s.e.m.

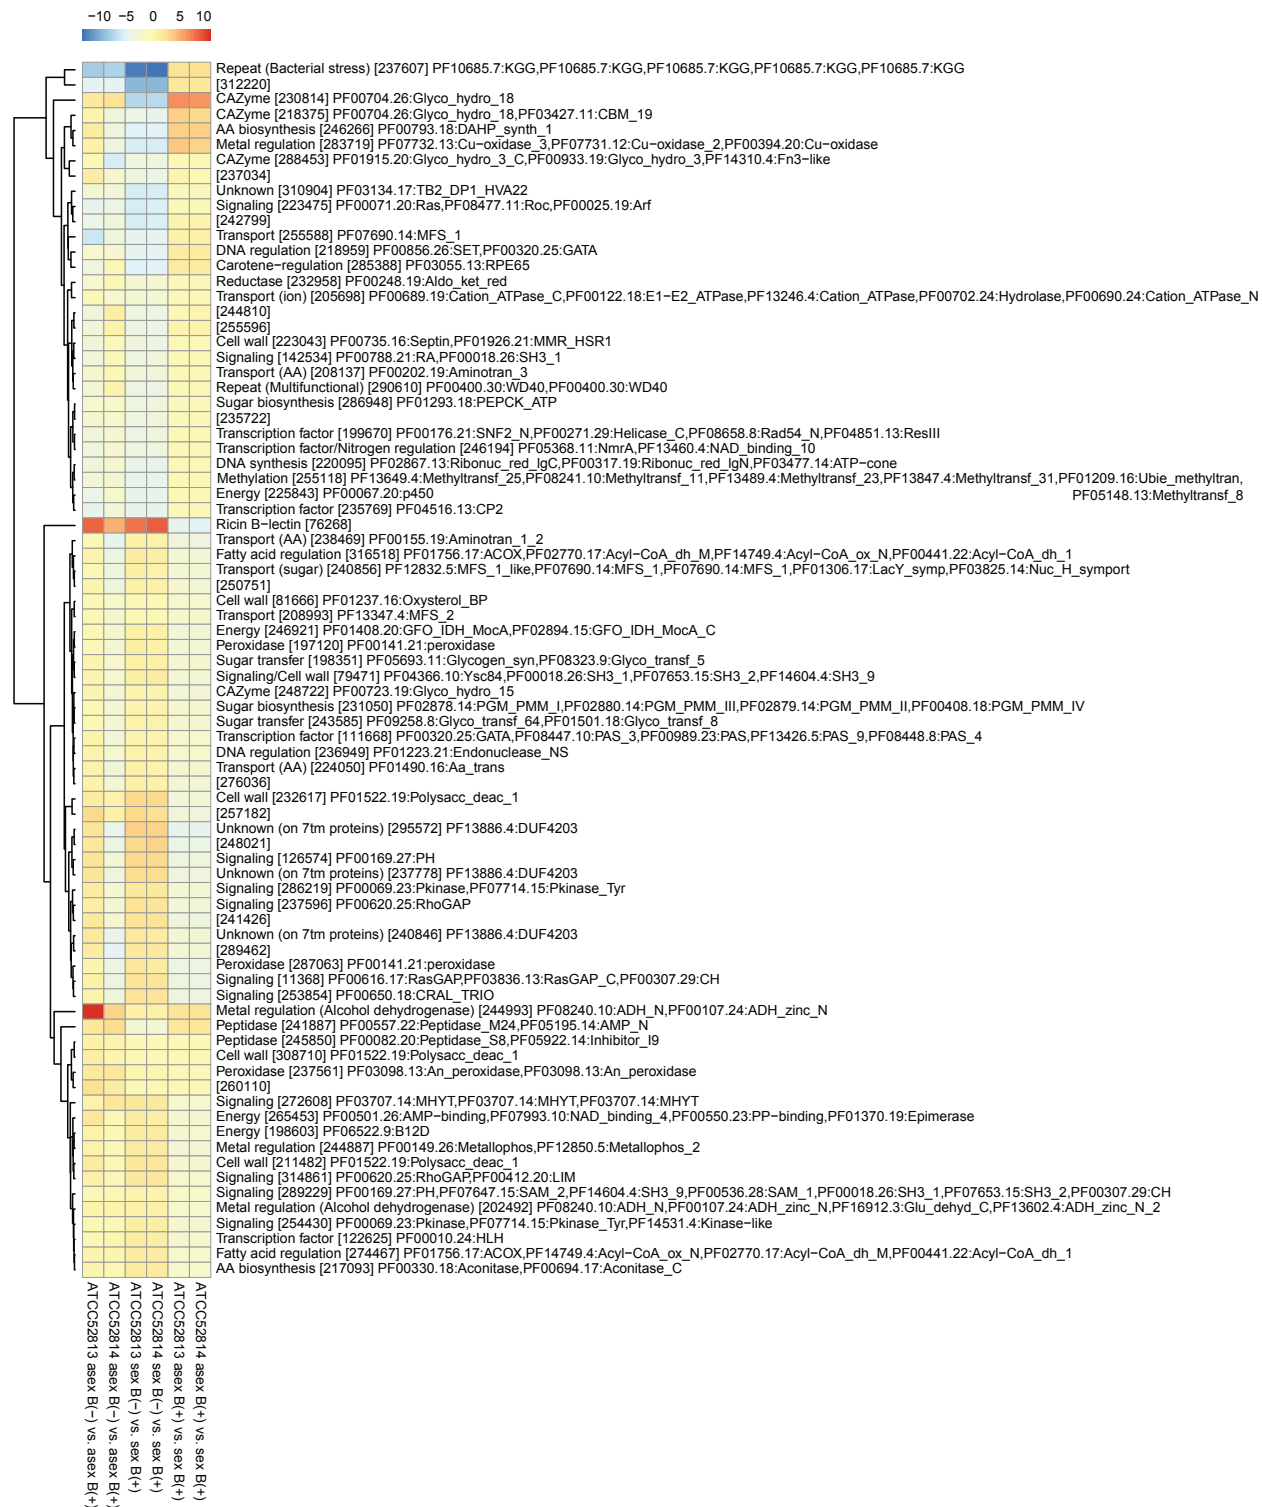

**Supplementary Figure 3. Log<sub>2</sub> fold change in expression of *Rm* genes displaying significant differences across all experimental comparisons.** Broad categories (Signaling, Cell wall, etc) as well as all Pfam annotations are shown for each gene. *Rm* ATCC 52813 Protein IDs are shown in brackets.

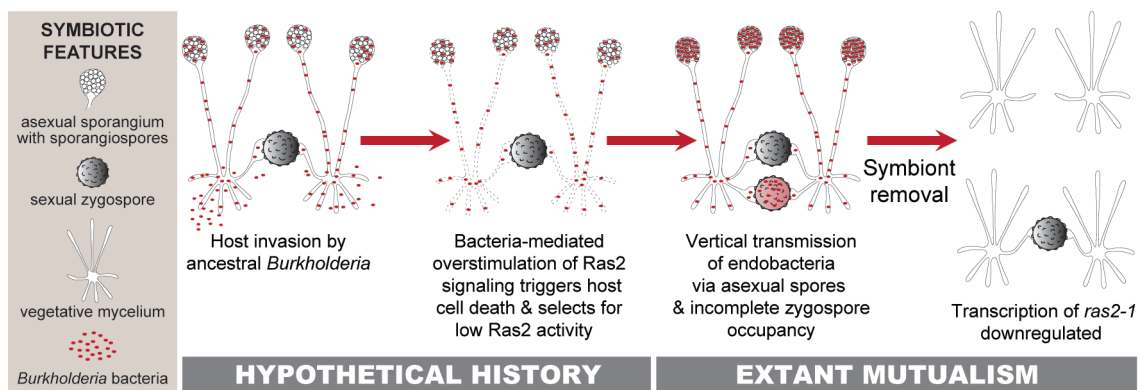

**Supplementary Figure 4. Hypothetical evolutionary trajectory leading to the present-day *Rm-Burkholderia* mutualism.**

## Supplementary References

- 1 Dyer, P. S. & O'Gorman, C. M. Sexual development and cryptic sexuality in fungi: insights from *Aspergillus* species. *FEMS Microbiol. Rev.* **36**, 165-192, doi:10.1111/j.1574-6976.2011.00308.x (2012).
- 2 Hoffmann, B., Wanke, C., LaPaglia, S. K. & Braus, G. H. c-Jun and RACK1 homologues regulate a control point for sexual development in *Aspergillus nidulans*. *Mol. Microbiol.* **37**, 28-41, doi:10.1046/j.1365-2958.2000.01954.x (2000).
- 3 Bayram, Ö., Sari, F., Braus, G. H. & Irniger, S. The protein kinase ImeB is required for light-mediated inhibition of sexual development and for mycotoxin production in *Aspergillus nidulans*. *Mol. Microbiol.* **71**, 1278-1295, doi:10.1111/j.1365-2958.2009.06606.x (2009).
- 4 Lee, D. W. *et al.* The *IsdA* gene is necessary for sexual development inhibition by a salt in *Aspergillus nidulans*. *Curr. Genet.* **39**, 237-243 (2001).
- 5 Purschwitz, J. *et al.* Functional and physical interaction of blue- and red-light sensors in *Aspergillus nidulans*. *Curr. Biol.* **18**, 255-259, doi:10.1016/j.cub.2008.01.061 (2008).
- 6 Bayram, Ö., Biesemann, C., Krappmann, S., Galland, P. & Braus, G. H. More than a repair enzyme: *Aspergillus nidulans* photolyase-like CryA is a regulator of sexual development. *Mol. Biol. Cell* **19**, 3254-3262, doi:10.1091/mbc.E08-01-0061 (2008).
- 7 Blumenstein, A. *et al.* The *Aspergillus nidulans* phytochrome FphA represses sexual development in red light. *Curr. Biol.* **15**, 1833-1838, doi:10.1016/j.cub.2005.08.061 (2005).
- 8 Bayram, Ö. *et al.* VelB/VeA/LaeA complex coordinates light signal with fungal development and secondary metabolism. *Science* **320**, 1504-1506 (2008).
- 9 Ni, M. & Yu, J. H. A novel regulator couples sporogenesis and trehalose biogenesis in *Aspergillus nidulans*. *PLoS One* **2**, e970, doi:10.1371/journal.pone.0000970 (2007).
- 10 Park, H.-S. & Yu, J.-H. Genetic control of asexual sporulation in filamentous fungi. *Curr. Opin. Microbiol.* **15**, 669-677, doi:<http://dx.doi.org/10.1016/j.mib.2012.09.006> (2012).
- 11 Wu, D. L., Dou, X. W., Hashmi, S. B. & Osmani, S. A. The Pho80-like cyclin of *Aspergillus nidulans* regulates development independently of its role in phosphate acquisition. *J. Biol. Chem.* **279**, 37693-37703, doi:10.1074/jbc.M403853200 (2004).
- 12 Bussink, H. J. & Osmani, S. A. A cyclin-dependent kinase family member (PHOA) is required to link developmental fate to environmental conditions in *Aspergillus nidulans*. *EMBO J.* **17**, 3990-4003, doi:10.1093/emboj/17.14.3990 (1998).
- 13 Baidya, S., Cary, J. W., Grayburn, W. S. & Calvo, A. M. Role of nitric oxide and flavohemoglobin homolog genes in *Aspergillus nidulans* sexual development and mycotoxin production. *Appl. Environ. Microb.* **77**, 5524-5528, doi:10.1128/aem.00638-11 (2011).
- 14 Paoletti, M. *et al.* Mating type and the genetic basis of self-fertility in the model fungus *Aspergillus nidulans*. *Curr. Biol.* **17**, 1384-1389 (2007).
- 15 Idnurm, A., Walton, F. J., Floyd, A. & Heitman, J. Identification of the sex genes in an early diverged fungus. *Nature* **451**, 193-196 (2008).
- 16 Kämper, J., Reichmann, M., Romeis, T., Bölker, M. & Kahmann, R. Multiallelic recognition: Nonself-dependent dimerization of the bE and bW homeodomain proteins in *Ustilago maydis*. *Cell* **81**, 73-83, doi:10.1016/0092-8674(95)90372-0 (1995).
- 17 Trueblood, C. E., Boyartchuk, V. L. & Rine, J. Substrate specificity determinants in the farnesyltransferase beta-subunit. *P. Natl. Acad. Sci. USA* **94**, 10774-10779, doi:10.1073/pnas.94.20.10774 (1997).
- 18 Fujimura-Kamada, K., Nouvet, F. J. & Michaelis, S. A novel membrane-associated metalloprotease, Ste24p, is required for the first step of NH<sub>2</sub>-terminal processing of the yeast a-factor precursor. *J. Cell Biol.* **136**, 271-285, doi:10.1083/jcb.136.2.271 (1997).
- 19 Sapperstein, S., Berkower, C. & Michaelis, S. Nucleotide sequence of the yeast *STE14* gene, which encodes farnesylcysteine carboxyl methyltransferase, and demonstration of its essential role in a-factor export. *Mol. Cell. Biol.* **14**, 1438-1449 (1994).
- 20 Adames, N., Blundell, K., Ashby, M. N. & Boone, C. Role of yeast insulin-degrading enzyme homologs in pheromone processing and bud site selection. *Science* **270**, 464-467, doi:10.1126/science.270.5235.464 (1995).
- 21 McGrath, J. P. & Varshavsky, A. The yeast *STE6* gene encodes a homolog of the mammalian multidrug resistance P-glycoprotein. *Nature* **340**, 400-404, doi:10.1038/340400a0 (1989).

- 22 Julius, D., Blair, L., Brake, A., Sprague, G. & Thorner, J. Yeast  $\alpha$  factor is processed from a larger precursor polypeptide: The essential role of a membrane-bound dipeptidyl aminopeptidase. *Cell* **32**, 839-852, doi:10.1016/0092-8674(83)90070-3 (1983).
- 23 Dyer, P. S., Paoletti, M. & Archer, D. B. Genomics reveals sexual secrets of *Aspergillus*. *Microbiology* **149**, 2301–2303 (2003).
- 24 Seo, J. A., Han, K. H. & Yu, J. H. The *gprA* and *gprB* genes encode putative G protein-coupled receptors required for self-fertilization in *Aspergillus nidulans*. *Mol. Microbiol.* **53**, 1611-1623, doi:10.1111/j.1365-2958.2004.04232.x (2004).
- 25 Han, K. H., Seo, J. A. & Yu, J. H. A putative G protein-coupled receptor negatively controls sexual development in *Aspergillus nidulans*. *Mol. Microbiol.* **51**, 1333-1345, doi:10.1111/j.1365-2958.2003.03940.x (2004).
- 26 Wang, Y. *et al.* Characterizations and functions of regulator of G protein signaling (RGS) in fungi. *Appl Microbiol Biotechnol* **97**, 7977-7987, doi:10.1007/s00253-013-5133-1 (2013).
- 27 Regenfelder, E. *et al.* G proteins in *Ustilago maydis*: Transmission of multiple signals? *EMBO J.* **16**, 1934-1942, doi:10.1093/emboj/16.8.1934 (1997).
- 28 Rosén, S., Yu, J. H. & Adams, T. H. The *Aspergillus nidulans* *sfaD* gene encodes a G protein  $\beta$  subunit that is required for normal growth and repression of sporulation. *EMBO J.* **18**, 5592-5600, doi:10.1093/emboj/18.20.5592 (1999).
- 29 Seo, J. A., Han, K. H. & Yu, J. H. Multiple roles of a heterotrimeric G-protein  $\gamma$ -subunit in governing growth and development of *Aspergillus nidulans*. *Genetics* **171**, 81-89, doi:10.1534/genetics.105.042796 (2005).
- 30 Seo, J. A. & Yu, J. H. The phosducin-like protein PhnA is required for G  $\beta\gamma$ -mediated signaling for vegetative growth, developmental control, and toxin biosynthesis in *Aspergillus nidulans*. *Eukaryot. Cell* **5**, 400-410, doi:10.1128/ec.5.2.400-410.2006 (2006).
- 31 Han, K. H. *et al.* The *nsdD* gene encodes a putative GATA-type transcription factor necessary for sexual development of *Aspergillus nidulans*. *Mol. Microbiol.* **41**, 299-309, doi:10.1046/j.1365-2958.2001.02472.x (2001).
- 32 Müller, P., Katzenberger, J. D., Loubradou, G. & Kahmann, R. Guanyl nucleotide exchange factor *Sql2* and *Ras2* regulate filamentous growth in *Ustilago maydis*. *Eukaryot. Cell* **2**, 609-617, doi:10.1128/ec.2.3.609-617.2003 (2003).
- 33 Lee, N. & Kronstad, J. W. *ras2* controls morphogenesis, pheromone response, and pathogenicity in the fungal pathogen *Ustilago maydis*. *Eukaryot. Cell* **1**, 954-966, doi:10.1128/ec.1.6.954-966.2002 (2002).
- 34 Alepuz, P. M., Matheos, D., Cunningham, K. W. & Estruch, F. The *Saccharomyces cerevisiae* RanGTP-binding protein *Msn5p* is involved in different signal transduction pathways. *Genetics* **153**, 1219-1231 (1999).
- 35 Gold, S., Duncan, G., Barrett, K. & Kronstad, J. cAMP regulates morphogenesis in the fungal pathogen *Ustilago maydis*. *Gene. Dev.* **8**, 2805-2816, doi:10.1101/gad.8.23.2805 (1994).
- 36 Durrenberger, F., Wong, K. & Kronstad, J. W. Identification of a cAMP-dependent protein kinase catalytic subunit required for virulence and morphogenesis in *Ustilago maydis*. *P. Natl. Acad. Sci. USA* **95**, 5684-5689, doi:10.1073/pnas.95.10.5684 (1998).
- 37 Chenevert, J., Valtz, N. & Herskowitz, I. Identification of genes required for normal pheromone-induced cell polarization in *Saccharomyces cerevisiae*. *Genetics* **136**, 1287-1296 (1994).
- 38 Johnson, D. I. & Pringle, J. R. Molecular characterization of *CDC42*, a *Saccharomyces cerevisiae* gene involved in the development of cell polarity. *J. Cell Biol.* **111**, 143-152, doi:10.1083/jcb.111.1.143 (1990).
- 39 Ohya, Y., Miyamoto, S., Ohsumi, Y. & Anraku, Y. Calcium-sensitive *cls4* mutant of *Saccharomyces cerevisiae* with a defect in bud formation. *J. Bacteriol.* **165**, 28-33 (1986).
- 40 Lörincz, A. T. & Reed, S. I. Primary structure homology between the product of yeast cell division control gene *CDC28* and vertebrate oncogenes. *Nature* **307**, 183-185, doi:10.1038/307183a0 (1984).
- 41 Leberer, E., Dignard, D., H Marcus, D., Thomas, D. Y. & Whiteway, M. The protein kinase homolog *Ste20p* is required to link the yeast pheromone response G-protein  $\beta\gamma$  subunits to downstream signaling components. *EMBO J.* **11**, 4815-4824 (1992).

- 42 Printen, J. A. & Sprague, G. F. Protein-protein interactions in the yeast pheromone response pathway: Ste5p interacts with all members of the MAP kinase cascade. *Genetics* **138**, 609-619 (1994).
- 43 Wei, H. J., Requena, N. & Fischer, R. The MAPKK kinase SteC regulates conidiophore morphology and is essential for heterokaryon formation and sexual development in the homothallic fungus *Aspergillus nidulans*. *Mol. Microbiol.* **47**, 1577-1588, doi:10.1046/j.1365-2958.2003.03405.x (2003).
- 44 Helmstaedt, K. *et al.* Recruitment of the inhibitor Cand1 to the cullin substrate adaptor site mediates interaction to the neddylation site. *Mol. Biol. Cell* **22**, 153-164, doi:10.1091/mbc.E10-08-0732 (2011).
- 45 Tedford, K., Kim, S., Sa, D., Stevens, K. & Tyers, M. Regulation of the mating pheromone and invasive growth responses in yeast by two MAP kinase substrates. *Curr. Biol.* **7**, 228-238, doi:10.1016/s0960-9822(06)00118-7 (1997).
- 46 Doi, K. *et al.* MSG5, a novel protein phosphatase promotes adaptation to pheromone response in *Saccharomyces cerevisiae*. *EMBO J.* **13**, 61-70 (1994).
- 47 Busch, S. *et al.* An eight-subunit COP9 signalosome with an intact JAMM motif is required for fungal fruit body formation. *P. Natl. Acad. Sci. USA* **104**, 8089-8094, doi:10.1073/pnas.0702108104 (2007).
- 48 Wang, C. L., Shim, W. B. & Shaw, B. D. *Aspergillus nidulans* striatin (StrA) mediates sexual development and localizes to the endoplasmic reticulum. *Fungal Genet. Biol.* **47**, 789-799, doi:10.1016/j.fgb.2010.06.007 (2010).
- 49 Han, K. H. *et al.* The *Aspergillus nidulans* *esdC* (early sexual development) gene is necessary for sexual development and is controlled by *veA* and a heterotrimeric G protein. *Fungal Genet. Biol.* **45**, 310-318, doi:10.1016/j.fgb.2007.09.008 (2008).
- 50 Todd, R. B., Hynes, M. J. & Andrianopoulos, A. The *Aspergillus nidulans* *rcoA* gene is required for *veA*-dependent sexual development. *Genetics* **174**, 1685-1688, doi:10.1534/genetics.106.062893 (2006).
- 51 Tsitsigiannis, D. I., Kowieski, T. M., Zarnowski, R. & Keller, N. P. Three putative oxylipin biosynthetic genes integrate sexual and asexual development in *Aspergillus nidulans*. *Microbiology* **151**, 1809-1821, doi:10.1099/mic.0.27880-0 (2005).
- 52 Shore, D., Squire, M. & Nasmyth, K. A. Characterization of two genes required for the position-effect control of yeast mating-type genes. *EMBO J.* **3**, 2817-2823 (1984).
- 53 Ivy, J. M., Klar, A. J. S. & Hicks, J. B. Cloning and characterization of 4 SIR genes of *Saccharomyces cerevisiae*. *Mol. Cell. Biol.* **6**, 688-702 (1986).
- 54 Kawasaki, L., Sanchez, O., Shiozaki, K. & Aguirre, J. SakA MAP kinase is involved in stress signal transduction, sexual development and spore viability in *Aspergillus nidulans*. *Mol. Microbiol.* **45**, 1153-1163, doi:10.1046/j.1365-2958.2002.03087.x (2002).
- 55 Lara-Rojas, F., Sánchez, O., Kawasaki, L. & Aguirre, J. *Aspergillus nidulans* transcription factor AtfA interacts with the MAPK SakA to regulate general stress responses, development and spore functions. *Mol. Microbiol.* **80**, 436-454, doi:10.1111/j.1365-2958.2011.07581.x (2011).
- 56 Wu, J. G. & Miller, B. L. *Aspergillus* asexual reproduction and sexual reproduction are differentially affected by transcriptional and translational mechanisms regulating stunted gene expression. *Mol. Cell. Biol.* **17**, 6191-6201 (1997).
- 57 Pascon, R. C. & Miller, B. L. Morphogenesis in *Aspergillus nidulans* requires Dopey (DopA), a member of a novel family of leucine zipper-like proteins conserved from yeast to humans. *Mol. Microbiol.* **36**, 1250-1264, doi:10.1046/j.1365-2958.2000.01950.x (2000).
- 58 Busby, T. M., Miller, K. Y. & Miller, B. L. Suppression and enhancement of the *Aspergillus nidulans* *medusa* mutation by altered dosage of the *bristle* and *stunted* genes. *Genetics* **143**, 155-163 (1996).
- 59 Lee, B. Y. *et al.* Screening of growth- or development-related genes by using genomic library with inducible promoter in *Aspergillus nidulans*. *J. Microbiol.* **43**, 523-528 (2005).
- 60 Tüncher, A., Reinke, H., Martic, G., Caruso, M. L. & Brakhage, A. A. A basic-region helix-loop-helix protein-encoding gene (*devR*) involved in the development of *Aspergillus nidulans*. *Mol. Microbiol.* **52**, 227-241, doi:10.1111/j.1365-2958.2003.03961.x (2004).

- 61 Vienken, K. & Fischer, R. The Zn(II)<sub>2</sub>Cys<sub>6</sub> putative transcription factor NosA controls fruiting body formation in *Aspergillus nidulans*. *Mol. Microbiol.* **61**, 544-554, doi:10.1111/j.1365-2958.2006.05257.x (2006).
- 62 Kwon, N. J., Shin, K. S. & Yu, J. H. Characterization of the developmental regulator FlbE in *Aspergillus fumigatus* and *Aspergillus nidulans*. *Fungal Genet. Biol.* **47**, 981-993, doi:10.1016/j.fgb.2010.08.009 (2010).
- 63 Kwon, N. J., Garzia, A., Espeso, E. A., Ugalde, U. & Yu, J. H. FlbC is a putative nuclear C<sub>2</sub>H<sub>2</sub> transcription factor regulating development in *Aspergillus nidulans*. *Mol. Microbiol.* **77**, 1203-1219, doi:10.1111/j.1365-2958.2010.07282.x (2010).
- 64 Kim, H. R., Chae, K. S., Han, K. H. & Han, D. M. The *nsdC* gene encoding a putative C<sub>2</sub>H<sub>2</sub>-type transcription factor is a key activator of sexual development in *Aspergillus nidulans*. *Genetics* **182**, 771-783, doi:10.1534/genetics.109.101667 (2009).
- 65 Vienken, K., Scherer, M. & Fischer, R. The Zn(II)<sub>2</sub>Cys<sub>6</sub> putative *Aspergillus nidulans* transcription factor repressor of sexual development inhibits sexual development under low-carbon conditions and in submersed culture. *Genetics* **169**, 619-630, doi:10.1534/genetics.104.030767 (2005).
- 66 Vallim, M. A., Miller, K. Y. & Miller, B. L. *Aspergillus* SteA (Sterile12-like) is a homeodomain-C<sub>2</sub>/H<sub>2</sub>-Zn<sup>+2</sup> finger transcription factor required for sexual reproduction. *Mol. Microbiol.* **36**, 290-301, doi:10.1046/j.1365-2958.2000.01874.x (2000).
- 67 Thön, M., Al-Abdallah, Q., Hortschansky, P. & Brakhage, A. A. The thioredoxin system of the filamentous fungus *Aspergillus nidulans*: Impact on development and oxidative stress response. *J. Biol. Chem.* **282**, 27259-27269, doi:10.1074/jbc.M704298200 (2007).
- 68 Lara-Ortiz, T., Riveros-Rosas, H. & Aguirre, J. Reactive oxygen species generated by microbial NADPH oxidase NoxA regulate sexual development in *Aspergillus nidulans*. *Mol. Microbiol.* **50**, 1241-1255, doi:10.1046/j.1365-2958.2003.03800.x (2003).
- 69 Eisendle, M. *et al.* The intracellular siderophore ferricrocin is involved in iron storage, oxidative-stress resistance, germination, and sexual development in *Aspergillus nidulans*. *Eukaryot. Cell* **5**, 1596-1603, doi:10.1128/ec.00057-06 (2006).
- 70 Wei, H. J. *et al.* A putative high affinity hexose transporter, *hxtA*, of *Aspergillus nidulans* is induced in vegetative hyphae upon starvation and in ascogenous hyphae during cleistothecium formation. *Fungal Genet. Biol.* **41**, 148-156, doi:10.1016/j.fgb.2003.10.006 (2004).
- 71 Wei, H. J., Scherer, M., Singh, A., Liese, R. & Fischer, R. *Aspergillus nidulans* alpha-1,3 glucanase (mutanase), *mutA*, is expressed during sexual development and mobilizes mutan. *Fungal Genet. Biol.* **34**, 217-227, doi:10.1006/fgbi.2001.1303 (2001).
- 72 Krüger, M. & Fischer, R. Integrity of a Zn finger-like domain in SamB is crucial for morphogenesis in ascomycetous fungi. *EMBO J.* **17**, 204-214, doi:10.1093/emboj/17.1.204 (1998).
- 73 Krappmann, S. *et al.* The *Aspergillus nidulans* F-box protein GrrA links SCF activity to meiosis. *Mol. Microbiol.* **61**, 76-88, doi:10.1111/j.1365-2958.2006.05215.x (2006).
- 74 Kirk, K. E. & Morris, R. N. The *tubB* α-tubulin gene is essential for sexual development in *Aspergillus nidulans*. *Gene. Dev.* **5**, 2014-2023 (1991).
