# Supplementary material for: Bacterial endosymbionts influence host sexuality and reveal reproductive genes of early divergent fungi
Source: PubMed Central journal article supplement (PMC5705715; doi:10.1038/s41467-017-02052-8), 2017-11-29
Supplement: 41467_2017_2052_MOESM4_ESM.pdf [file 41467_2017_2052_MOESM4_ESM.pdf]

## **Description of Additional Supplementary Files**

File Name: Supplementary Data 1

Description: RNAseq results.

File Name: Supplementary Data 2

Description: OrthoMCL gene clusters.

File Name: Supplementary Data 3

Description: GPCR sequence alignment.

File Name: Supplementary Data 4

Description: GPCR phylogeny.

File Name: Supplementary Data 5

Description: Ras sequence alignment.
